# Supplementary material for: Potential energy barrier for proton transfer in compressed benzoic acid
Source: Royal Society of Chemistry journal article supplement (doi:10.1039/d2ra01736a), 2022-01-01
Supplement: d2ra01736a1.pdf [file d2ra01736a1.pdf]

## ELECTRONIC SUPPORTING INFORMATION

### Potential energy barrier for proton transfer in compressed benzoic acid

Dominik Kurzydłowski<sup>1\*</sup>

<sup>1</sup> Faculty of Mathematics and Natural Sciences, Cardinal Stefan Wyszyński University in Warsaw, 01-038 Warsaw, Poland;

**Table S 1** Comparison of the calculated and experimental geometry of BA crystals. Bond distances and cell vector lengths are given in Å, volume in Å<sup>3</sup>. Percentage difference between experimental data and r<sup>2</sup>SCAN calculations is given in parenthesis. Theoretical values are reported for the A tautomeric form.

| p = 0 GPa          | Exp (ref. 1) | Theory        | p = 0.3 GPa | Exp (ref. 2) | Theory        |
|--------------------|--------------|---------------|-------------|--------------|---------------|
| a                  | 5.401        | 5.483 (+1.5)  | a           | 5.315        | 5.405 (+1.7)  |
| b                  | 5.004        | 5.037 (+0.7)  | b           | 4.987        | 4.979 (−0.2)  |
| c                  | 21.879       | 21.945 (+0.3) | c           | 21.630       | 21.631 (0.0)  |
| V                  | 584.8        | 602.92 (+3.1) | V           | 566.3        | 575.4 (+1.6)  |
| R <sub>O...O</sub> | 2.623        | 2.564 (−2.2)  |             |              |               |
| R <sub>O-H</sub>   | 1.019        | 1.021 (+0.2)  |             |              |               |
| R <sub>C-O</sub>   | 1.320        | 1.316 (−0.3)  |             |              |               |
| R <sub>C=O</sub>   | 1.233        | 1.242 (+0.7)  |             |              |               |
| p = 2.2 GPa        | Exp (ref. 3) | Theory        | p = 15 GPa  | Exp (ref. 4) | Theory        |
| a                  | 5.077        | 5.094 (+0.3)  | a           | 4.768        | 4.608 (−3.4)  |
| b                  | 4.893        | 4.852 (−0.8)  | b           | 4.692        | 4.597 (−2.0)  |
| c                  | 21.1         | 20.998 (−0.5) | c           | 19.983       | 19.431 (−2.8) |
| V                  | 515.0        | 509.4 (−1.1)  | V           | 428.2        | 396.6 (−7.4)  |

## REFERENCES

- 1 F. Fillaux and A. Cousson, *Chem. Phys.*, 2016, **479**, 26–35.
- 2 D. F. Brougham, A. J. Horsewill, A. Ikram, R. M. Ibberson, P. J. McDonald and M. Pinter-Krainer, *J. Chem. Phys.*, 1996, **105**, 979–982.
- 3 W. Cai and A. Katrusiak, *CrystEngComm*, 2012, **14**, 4420.
- 4 L. Kang, K. Wang, X. Li and B. Zou, *J. Phys. Chem. C*, 2016, **120**, 14758–14766.
